# Supplementary material
Source: PubMed Central journal article supplement (PMC5916531)
Supplement: NIHMS951608-supplement-Acknowledgement_Permission_Form.pdf [file NIHMS951608-supplement-Acknowledgement_Permission_Form.pdf]

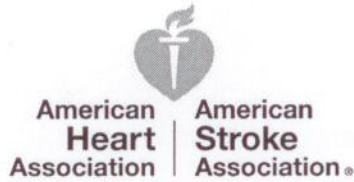

## Acknowledgment Permission Form

---

Journal Stroke

Manuscript Number \_\_\_\_\_

First Author Janina Markidan

Title of Work Smoking and Risk of Ischemic Stroke in Young Men

Authors must provide written permission/approval from all individuals mentioned by name in the Acknowledgments section of a submitted manuscript. By signing this form, any and all acknowledged persons therefore state that they have read and approved the mention of their names in the Acknowledgment section of the aforementioned paper.

|                                 |                                                                                                     |                        |
|---------------------------------|-----------------------------------------------------------------------------------------------------|------------------------|
| Name (1) <u>Kathleen A Ryan</u> | Signature <u>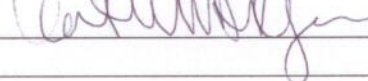</u> | Date <u>11/27/2017</u> |
| Name (2) _____                  | Signature _____                                                                                     | Date _____             |
| Name (3) _____                  | Signature _____                                                                                     | Date _____             |
| Name (4) _____                  | Signature _____                                                                                     | Date _____             |
| Name (5) _____                  | Signature _____                                                                                     | Date _____             |
| Name (6) _____                  | Signature _____                                                                                     | Date _____             |
| Name (7) _____                  | Signature _____                                                                                     | Date _____             |
| Name (8) _____                  | Signature _____                                                                                     | Date _____             |
| Name (9) _____                  | Signature _____                                                                                     | Date _____             |
| Name (10) _____                 | Signature _____                                                                                     | Date _____             |
| Name (11) _____                 | Signature _____                                                                                     | Date _____             |
| Name (12) _____                 | Signature _____                                                                                     | Date _____             |
| Name (13) _____                 | Signature _____                                                                                     | Date _____             |
| Name (14) _____                 | Signature _____                                                                                     | Date _____             |
| Name (15) _____                 | Signature _____                                                                                     | Date _____             |
| Name (16) _____                 | Signature _____                                                                                     | Date _____             |
| Name (17) _____                 | Signature _____                                                                                     | Date _____             |
| Name (18) _____                 | Signature _____                                                                                     | Date _____             |
| Name (19) _____                 | Signature _____                                                                                     | Date _____             |
| Name (20) _____                 | Signature _____                                                                                     | Date _____             |
